# Supplementary material for: Photophysical and Computational Insights into Ag(I) Complexation of Porphyrinic Covalent Cages Equipped with Triazoles-Incorporating Linkers
Source: PubMed Central journal article supplement (PMC9109141; doi:10.1021/acs.jpcb.2c01111), 2022-04-28
Supplement: jp2c01111_si_001.pdf [file jp2c01111_si_001.pdf]

## Supporting Information for

# Photophysical and Computational Insights into Ag(I) Complexation of Porphyrinic Covalent Cages Equipped with Triazoles Incorporating Linkers

*Daniel Sánchez-Resa,<sup>a</sup> Isabella Daidone,<sup>b</sup> Ryan Djemili,<sup>c</sup> Sonia Adrouche,<sup>c</sup> Stéphanie Durot,<sup>c</sup> Valérie Heitz,<sup>\*,c</sup> Laura Zanetti-Polzi,<sup>\*,d</sup> Barbara Ventura<sup>\*,a</sup>*

<sup>a</sup> Istituto ISOF-CNR, Via P. Gobetti 101, 40129 Bologna, Italy. email: barbara.ventura@isof.cnr.it

<sup>b</sup> Department of Physical and Chemical Sciences, University of L'Aquila, Via Vetoio (Coppito 1), 67010 L'Aquila, Italy.

<sup>c</sup> Laboratoire de Synthèse des Assemblages Moléculaires Multifonctionnels, Institut de Chimie de Strasbourg, CNRS/UMR 7177, Université de Strasbourg, France. email: v.heitz@unistra.fr

<sup>d</sup> CNR Institute of Nanoscience, Via Campi 213/A, 41125 Modena, Italy. email: laura.zanettipolzi@nano.cnr.it

### Table of contents:

|                                      |         |
|--------------------------------------|---------|
| <b>Additional spectroscopic data</b> | Pag. S2 |
| <b>Figure S1</b>                     | Pag. S2 |
| <b>Figure S2</b>                     | Pag. S2 |
| <b>Figure S3</b>                     | Pag. S3 |
| <b>Chart S1</b>                      | Pag. S3 |

|                                      |         |
|--------------------------------------|---------|
| <b>Figure S4</b>                     | Pag. S4 |
| <b>Figure S5</b>                     | Pag. S5 |
| <b>Figure S6</b>                     | Pag. S5 |
| <b>Figure S7</b>                     | Pag. S6 |
| <b>Figure S8</b>                     | Pag. S6 |
| <b>Additional computational data</b> | Pag. S7 |
| <b>Figure S9</b>                     | Pag. S7 |
| <b>Figure S10</b>                    | Pag. S7 |

## Additional spectroscopic data:

### - 2H-S-2H

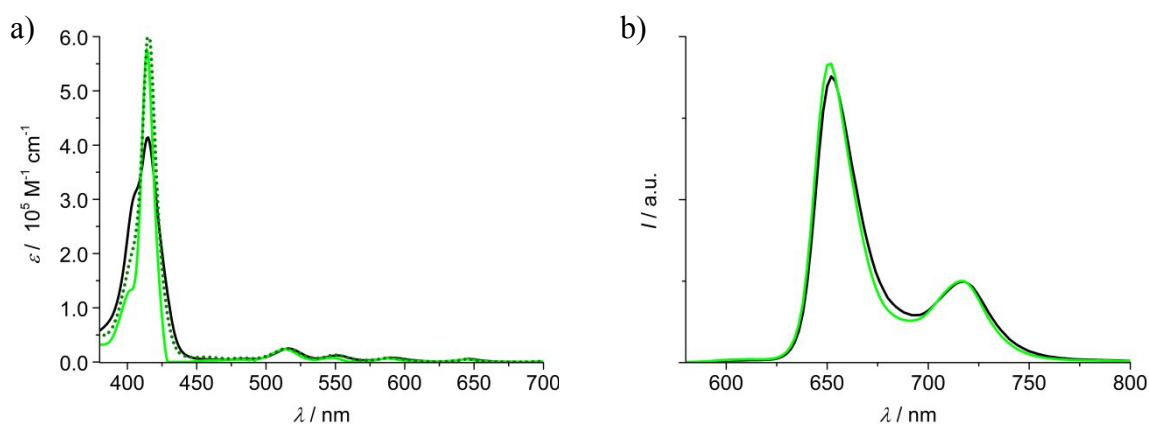

**Figure S1.** a) Experimental absorption spectrum of **2H-S-2H** (black, imposed in the fitting) and fitted absorption spectrum of the complex  $[(2H-S-2H)Ag_4]^{4+}$  (green) in DCM/MeOH (9:1). The experimental absorption spectrum registered at the end of the titration is also reported for comparison purposes (olive dotted). b) Fitted emission spectra of **2H-S-2H** (black) and  $[(2H-S-2H)Ag_4]^{4+}$  (green). The fittings were performed with the software Reactlab Equilibria by using a 1:4 (cage:Ag<sup>+</sup>) binding model and Ag<sup>+</sup> as a non-absorbing and non-emissive species.

### - 2H-L-2H

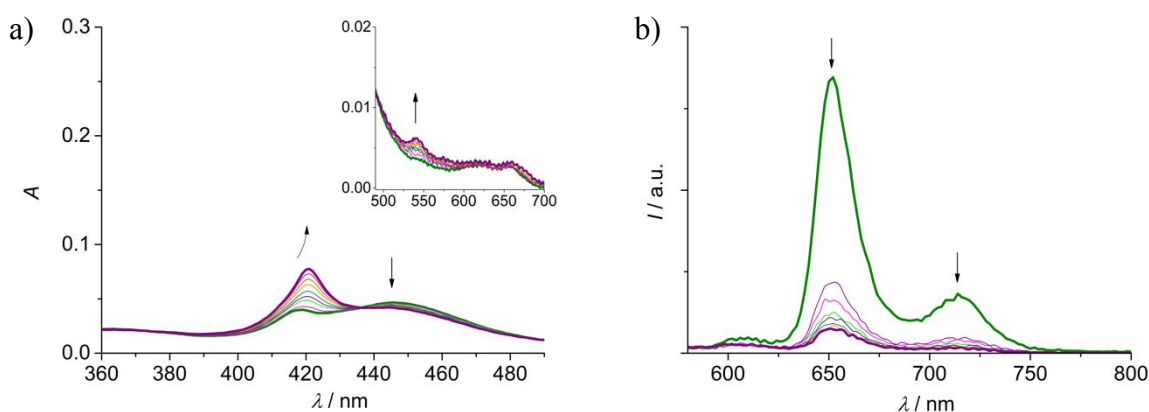

**Figure S2.** Absorption (a) and uncorrected emission (b) spectra ( $\lambda_{exc} = 434$  nm, isosbestic point) of DCM/MeOH (9:1) solutions containing **2H-L-2H** ( $5.6 \times 10^{-7}$  M) and increasing amounts of Ag(OTf) (30-400 equivalents). Inset of (a): amplification of the Q-bands region (490-700 nm). In (b) the y-axis scale is amplified by a factor 3 with respect to the scale of Figure 3b.

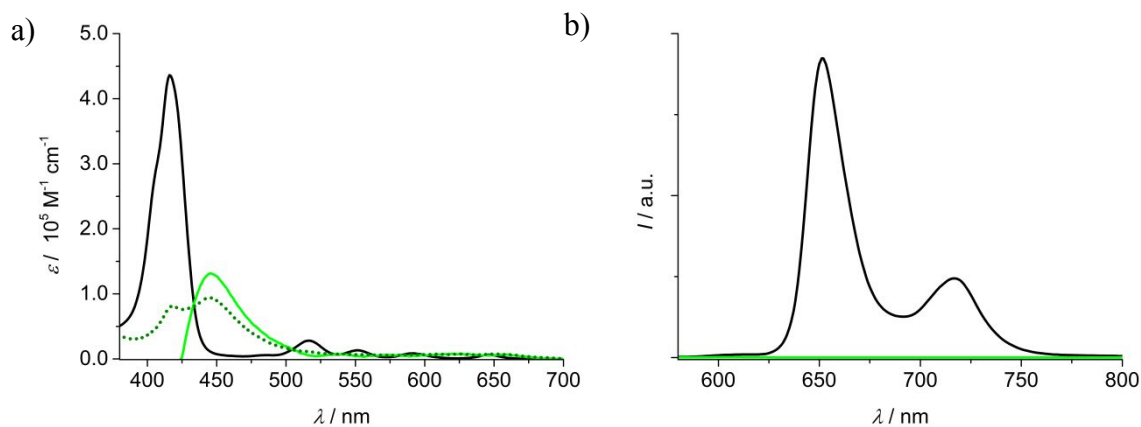

**Figure S3.** a) Experimental absorption spectrum of **2H-L-2H** (black, imposed in the fitting) and fitted absorption spectrum of the complex  $[(2H-L-2H)Ag_2]^{4+}$  (green) in DCM/MeOH (9:1). The experimental absorption spectrum registered at the end of the first step (30 equiv.) of the titration is also reported for comparison purposes (olive dotted). b) Fitted emission spectra of **2H-L-2H** (black) and  $[(2H-L-2H)Ag_2]^{4+}$  (green). The fitting was performed with the software Reactlab Equilibria by using a 1:2 (cage:Ag<sup>+</sup>) binding model and Ag<sup>+</sup> as a non-absorbing and non-emissive species.

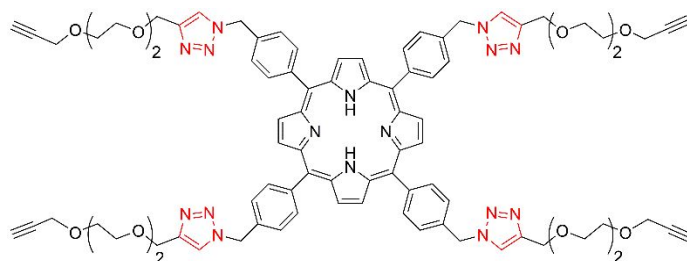

**Chart S1.** Structure of model **2H-alkyne**.

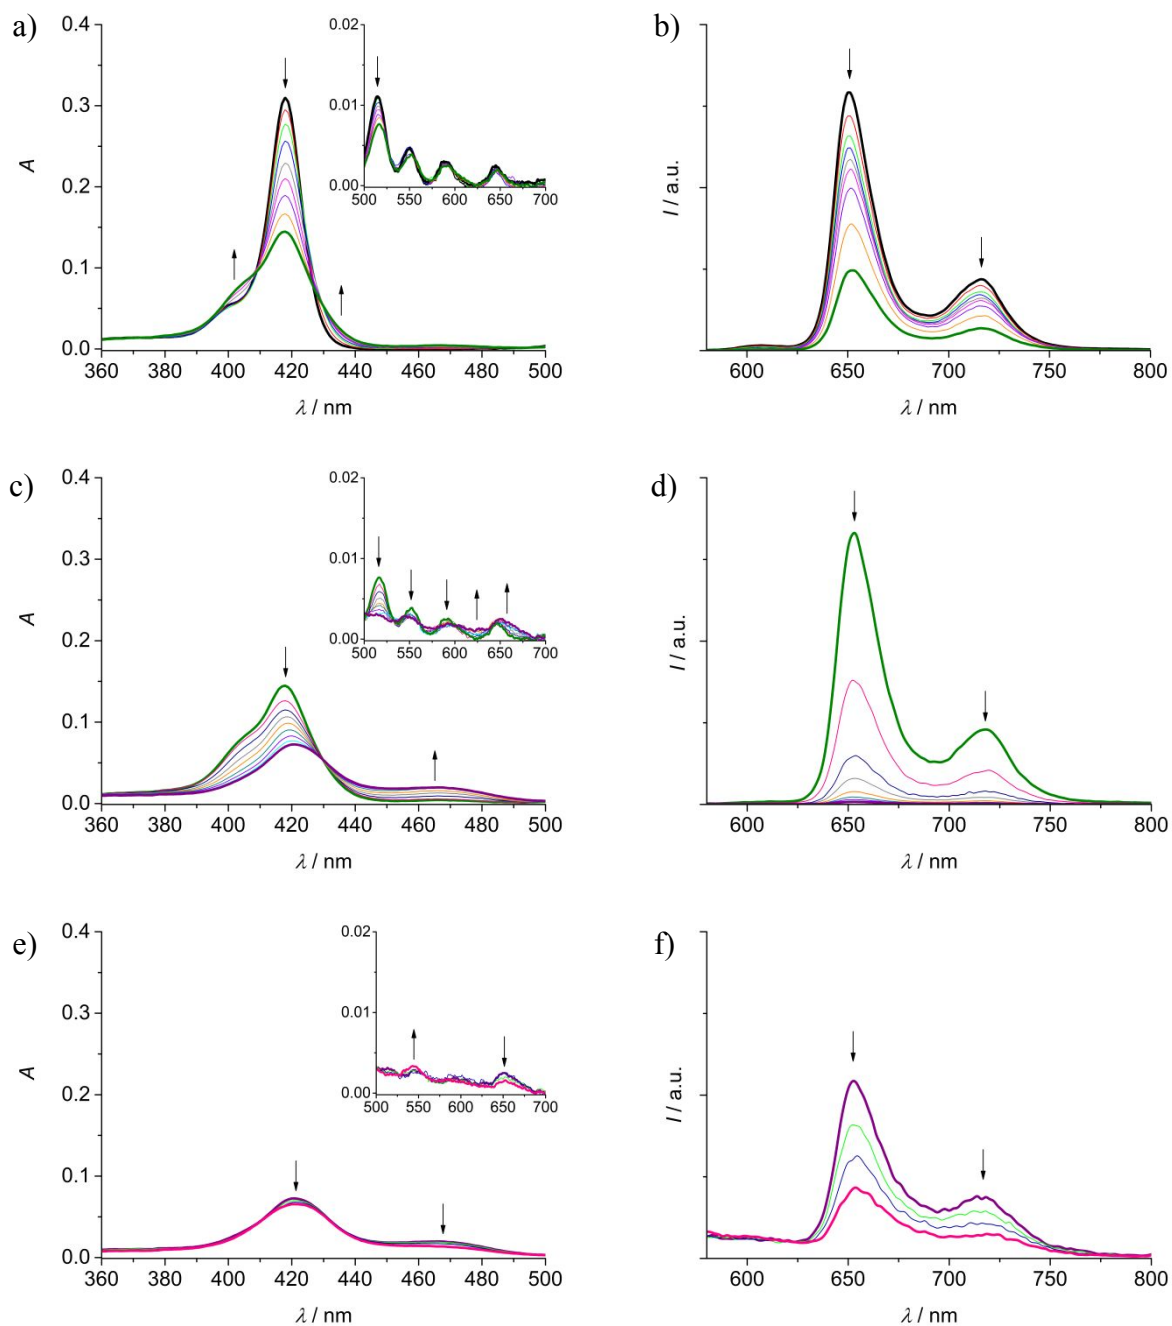

**Figure S4.** Absorption and uncorrected emission spectra of DCM/MeOH (9:1) solutions containing **2H-alkyne** ( $1.2 \times 10^{-6}$  M) and increasing amounts of Ag(OTf): (a-b) 0-9 equivalents,  $\lambda_{\text{exc}} = 428$  nm, isosbestic point; (c-d) 9-30 equivalents,  $\lambda_{\text{exc}} = 430$  nm, isosbestic point; (e-f) 30-250 equivalents,  $\lambda_{\text{exc}} = 430$  nm, isoabsorbing point. In (f) the y-axis scale is amplified by a factor 15 with respect to the scale of (d). Insets of (a,c,e): amplification of the Q-bands region (500-700 nm).

- Zn-S-2H

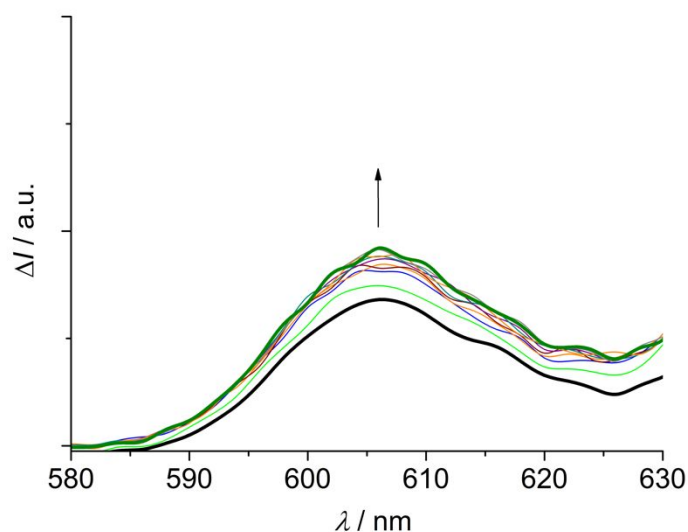

**Figure S5.** Emission spectra ( $\lambda_{\text{exc}} = 415.5$  nm) of DCM/MeOH (9:1) solutions containing **Zn-S-2H** ( $5.5 \times 10^{-7}$  M) and increasing amounts of AgOTf (0-40 equivalents). The spectra are expressed as differential intensity, calculated by subtracting, from the spectrum of the cage at each point of the titration, an emission spectrum of **2H-S-2H** normalized at 712 nm.

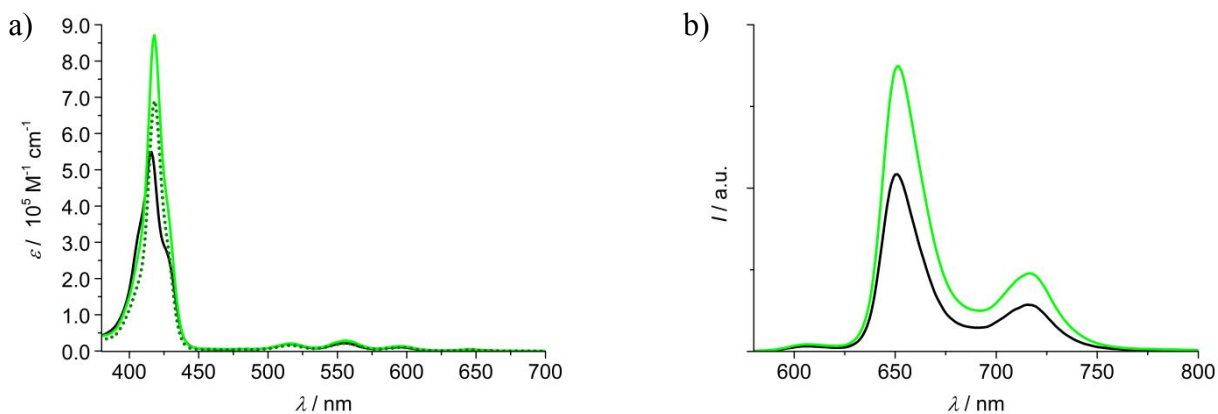

**Figure S6.** a) Experimental absorption spectrum of **Zn-S-2H** (black, imposed in the fitting) and fitted absorption spectrum of the complex  $[(\text{Zn-S-2H})\text{Ag}_4]^{4+}$  (green) in DCM/MeOH (9:1). The experimental absorption spectrum registered at the end of the titration is also reported for comparison purposes (olive dotted). b) Fitted emission spectra of **Zn-S-2H** (black) and  $[(\text{Zn-S-2H})\text{Ag}_4]^{4+}$  (green). The fittings were performed with the software Reactlab Equilibria by using a 1:4 (cage: $\text{Ag}^+$ ) binding model and  $\text{Ag}^+$  as a non-absorbing and non-emissive species.

- **Zn-L-2H**

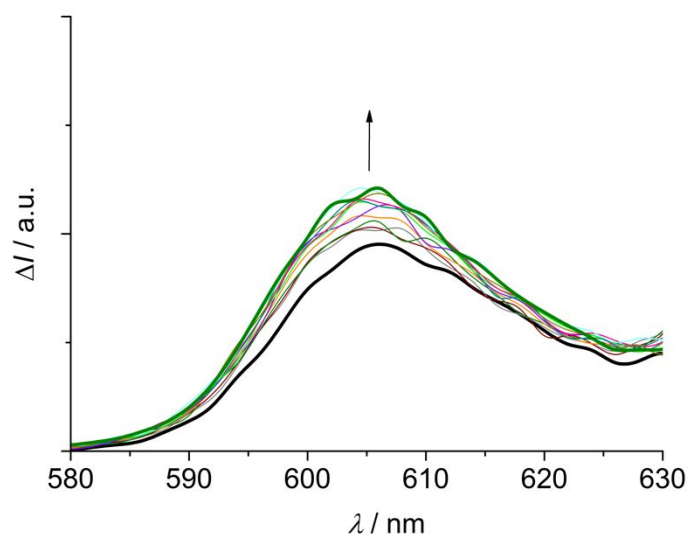

**Figure S7.** Emission spectra ( $\lambda_{\text{exc}} = 421 \text{ nm}$ ) of DCM/MeOH (9:1) solutions containing **Zn-L-2H** ( $6.5 \times 10^{-7} \text{ M}$ ) and increasing amounts of AgOTf (0-40 equivalents). The spectra are expressed as differential intensity, calculated by subtracting, from the spectrum of the cage at each point of the titration, an emission spectrum of **2H-L-2H** normalized at 712 nm.

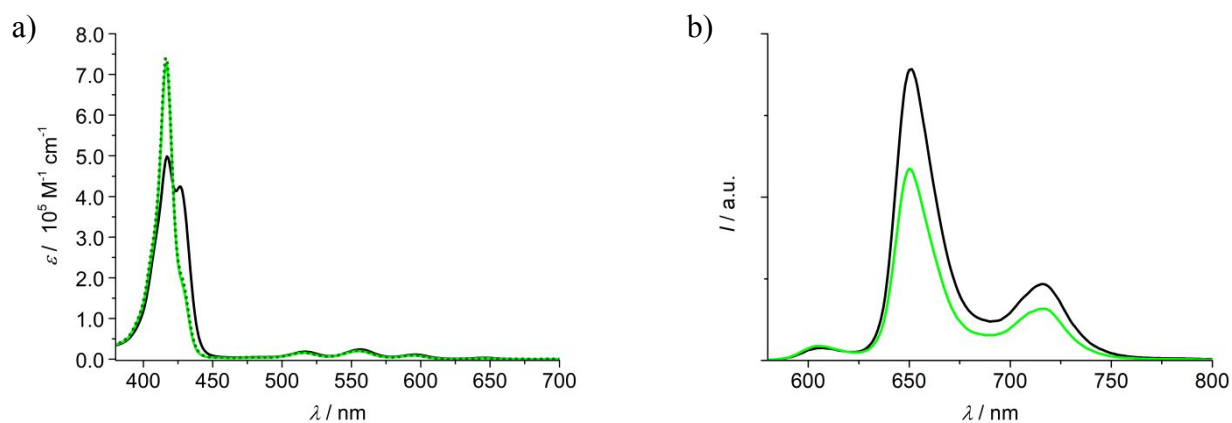

**Figure S8.** a) Experimental absorption spectrum of **Zn-L-2H** (black, imposed in the fitting) and fitted absorption spectrum of the complex  $[(\text{Zn-L-2H})\text{Ag}_4]^{4+}$  (green) in DCM/MeOH (9:1). The experimental absorption spectrum registered at the end of the titration is also reported for comparison purposes (olive dotted). b) Fitted emission spectra of **Zn-L-2H** (black) and  $[(\text{Zn-L-2H})\text{Ag}_4]^{4+}$  (green). The fittings were performed with the software Reactlab Equilibria by using a 1:4 (cage:Ag<sup>+</sup>) binding model and Ag<sup>+</sup> as a non-absorbing and non-emissive species.

**Additional computational data:**

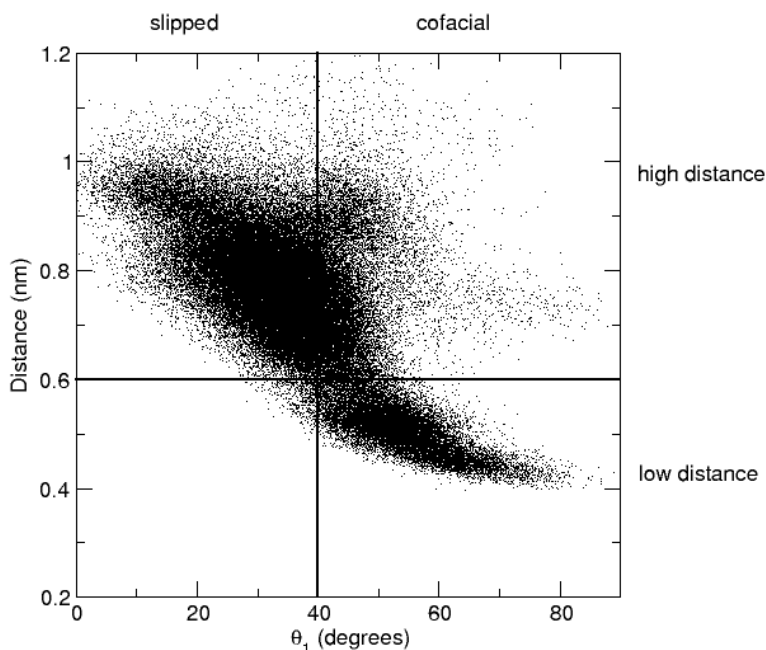

**Figure S9.** Bidimensional distribution of the distance between the centers of mass of the two porphyrin rings and  $\theta_1$  in the MD simulation of **2H-S-2H**.

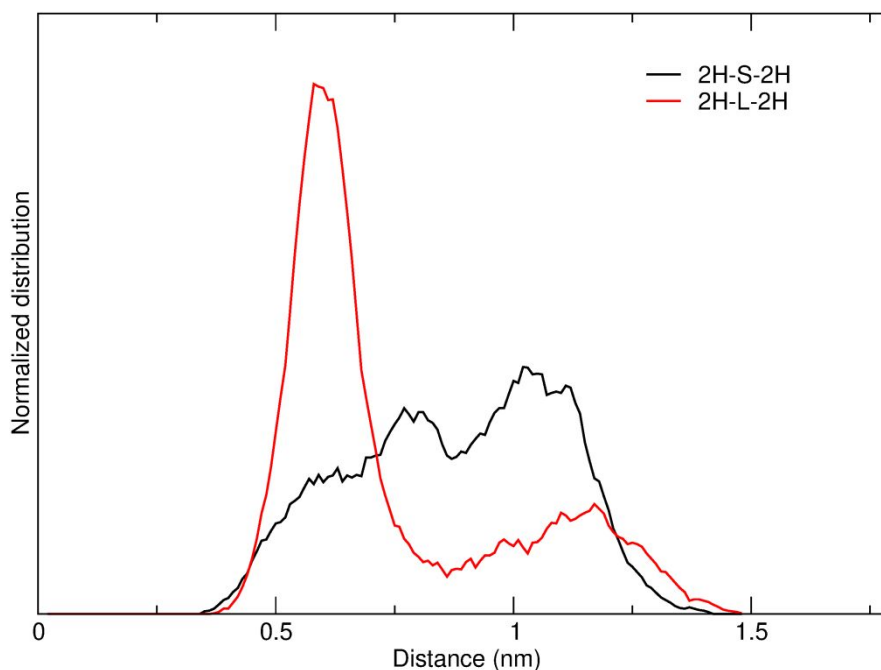

**Figure S10.** Normalized distribution of the distance between the two carbons connecting the phenyl and triazole rings of each linker in the MD simulations of **2H-S-2H** (black) and **2H-L-2H** (red). The curves are obtained by averaging the distributions of the distance obtained for each of the four linkers of the two cages.
